# Supplementary material
Source: PubMed Central journal article supplement (PMC2290771)
Supplement: pnas_0712393105_12.pdf [file pnas_0712393105_12.pdf]

(a) N\_N

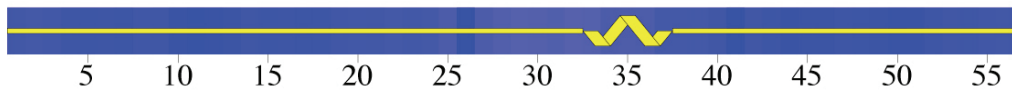

(b) NDV\_N

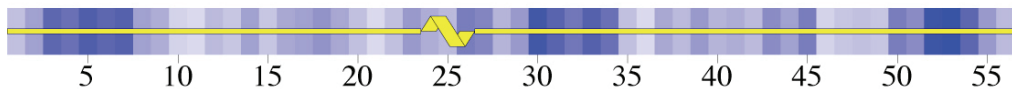

(c) ND\_ND

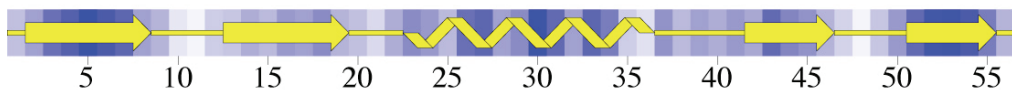

(d) NDV\_NDV

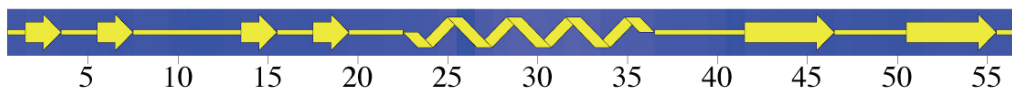

(e) NDV\_ND

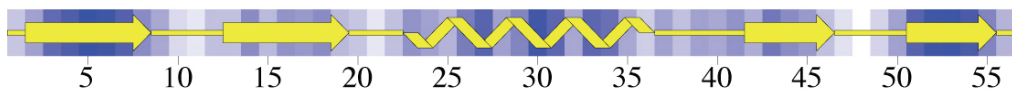

(f) NDV\_NV

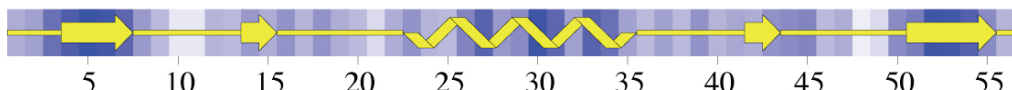

(g) ND\_NV

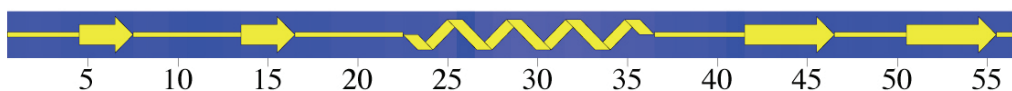

(h) ND\_NDV

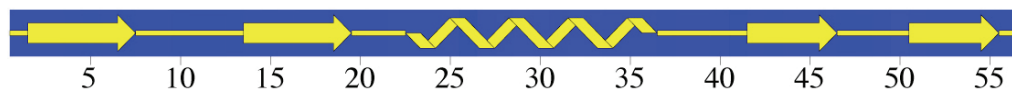

MQYKLI LNGLTKLKGETTTEAVDAATAEKVFKQYANDNGVDGEWTYDDATKTFVT E
