# Supplementary material
Source: PubMed Central journal article supplement (PMC2290771)

F1,  $^{15}\text{N}$  Chemical Shift (ppm)

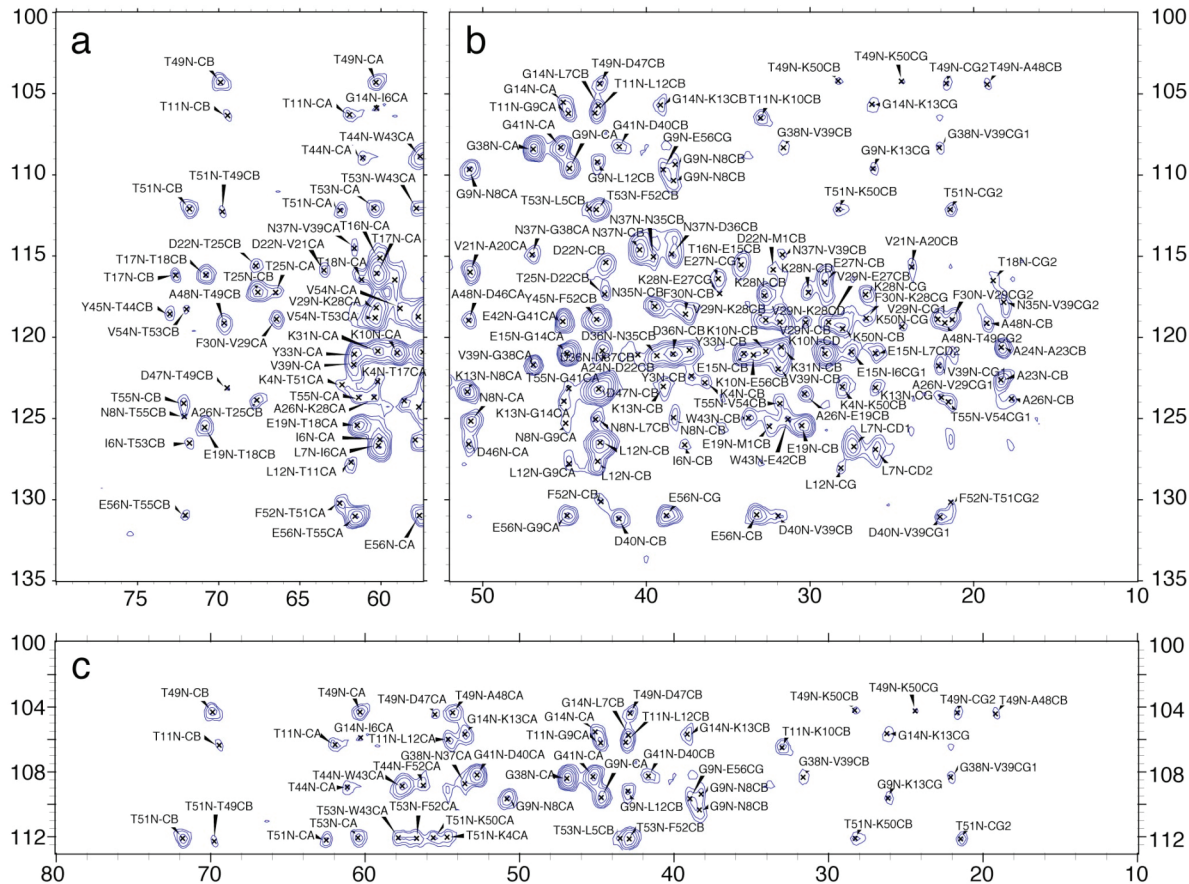

Supplement: pnas_0712393105_1.pdf [file pnas_0712393105_1.pdf]

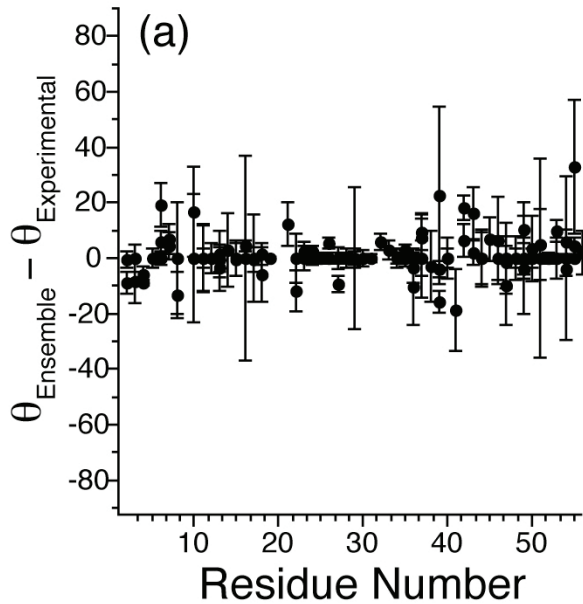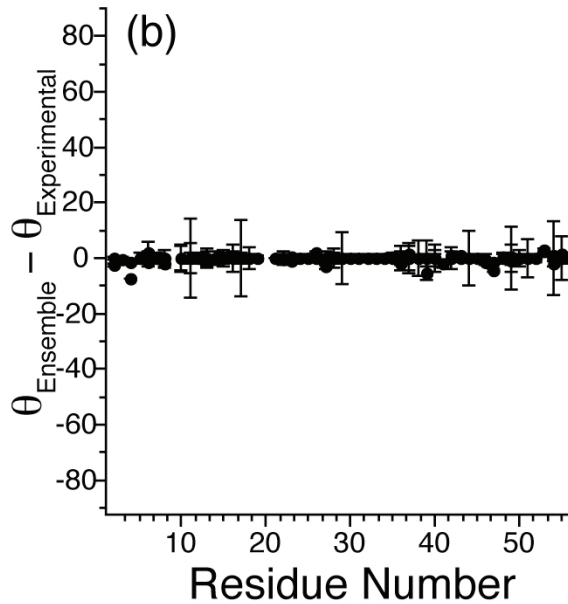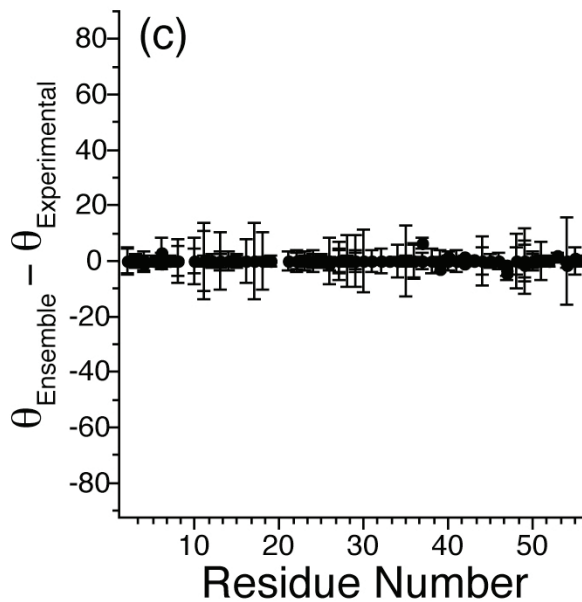

Supplement: pnas_0712393105_10.pdf [file pnas_0712393105_10.pdf]

Percentage of residues in  
most favoured regions

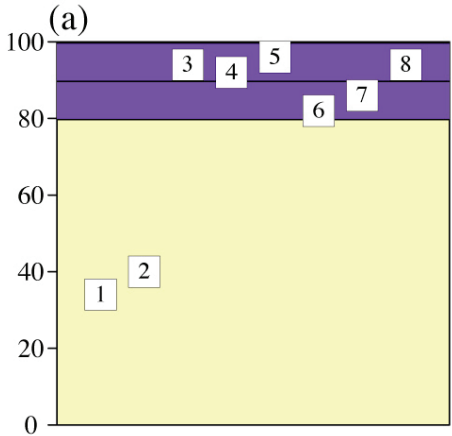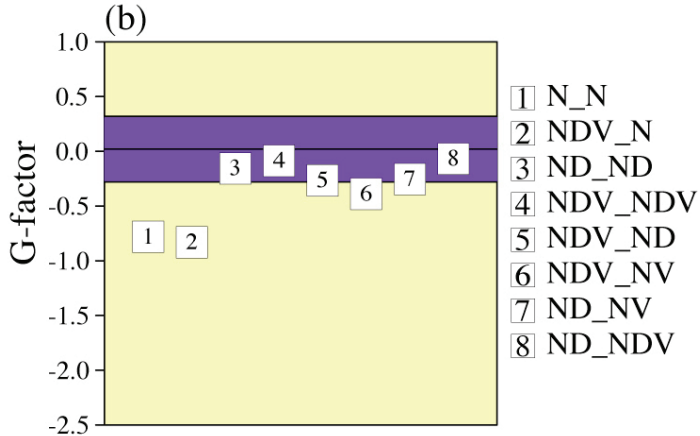

Supplement: pnas_0712393105_11.pdf [file pnas_0712393105_11.pdf]

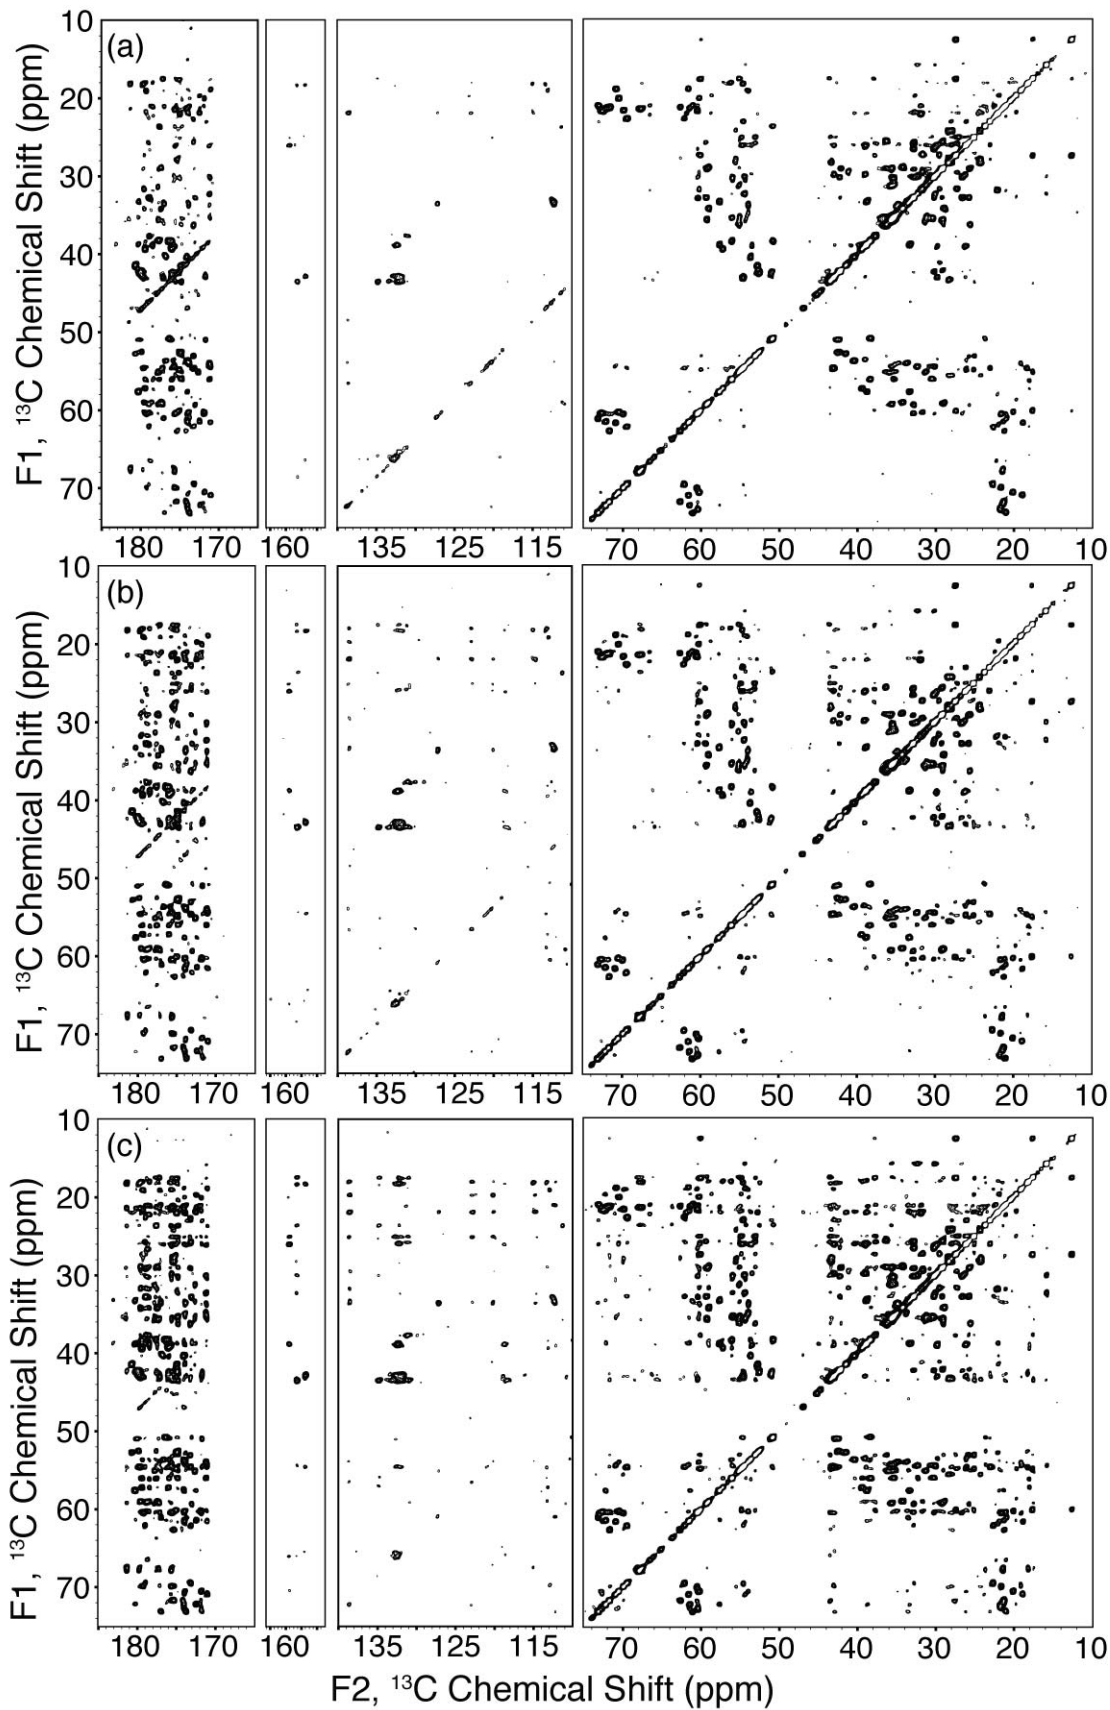

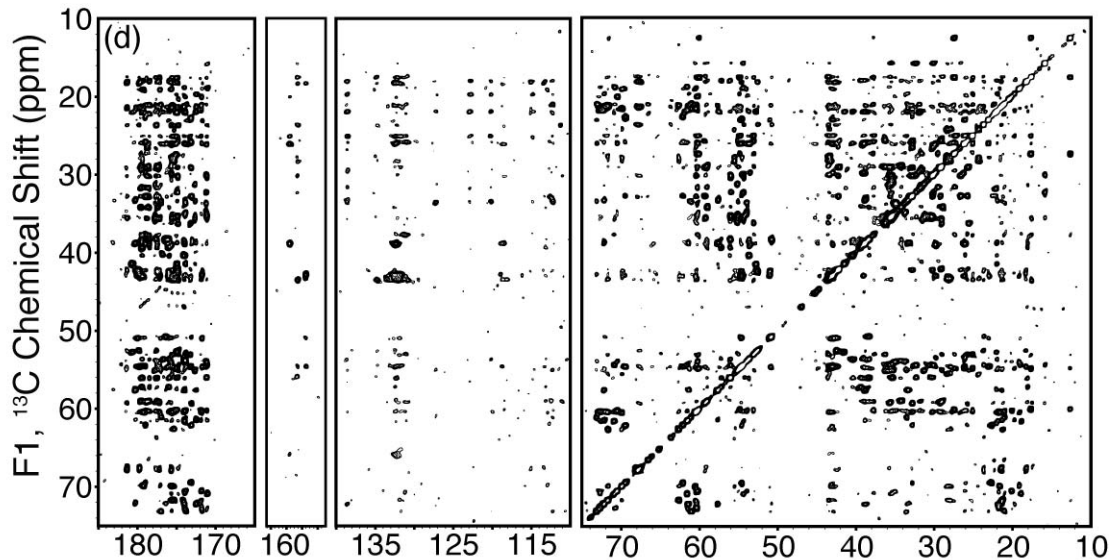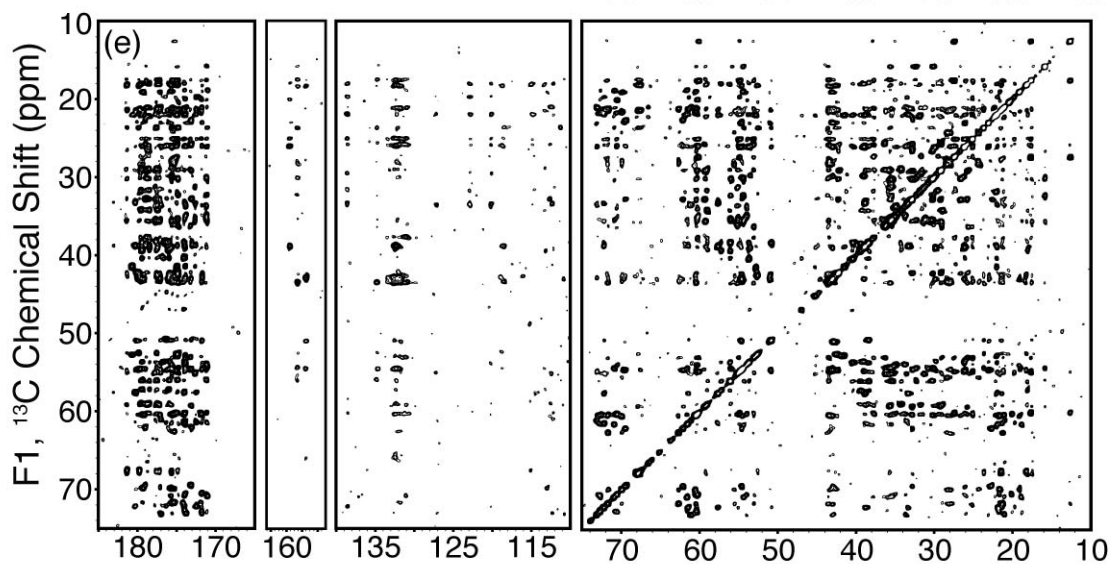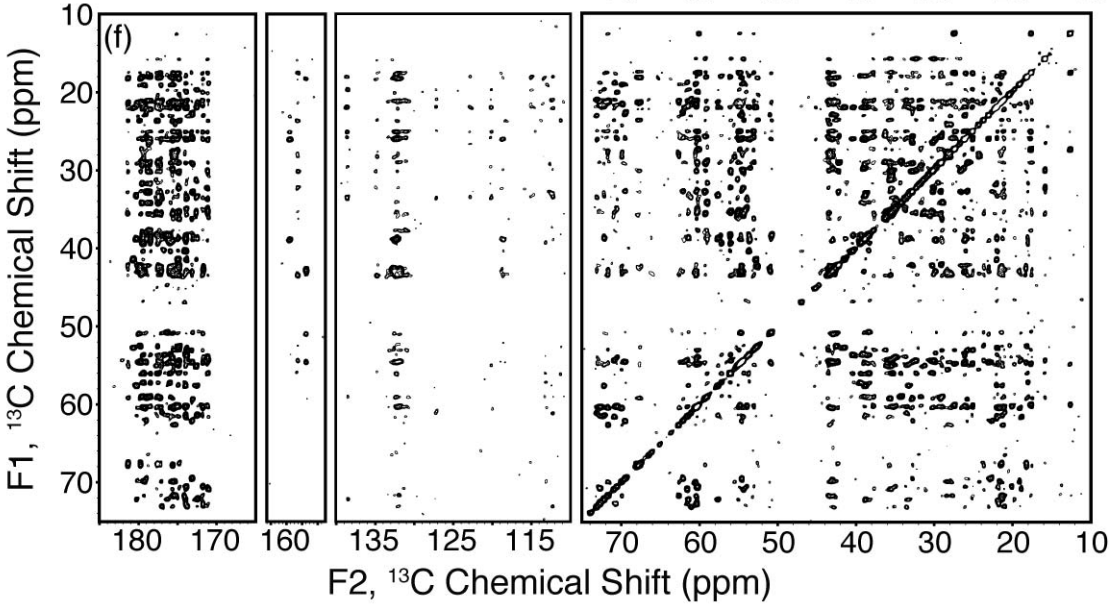

Supplement: pnas_0712393105_2.pdf [file pnas_0712393105_2.pdf]

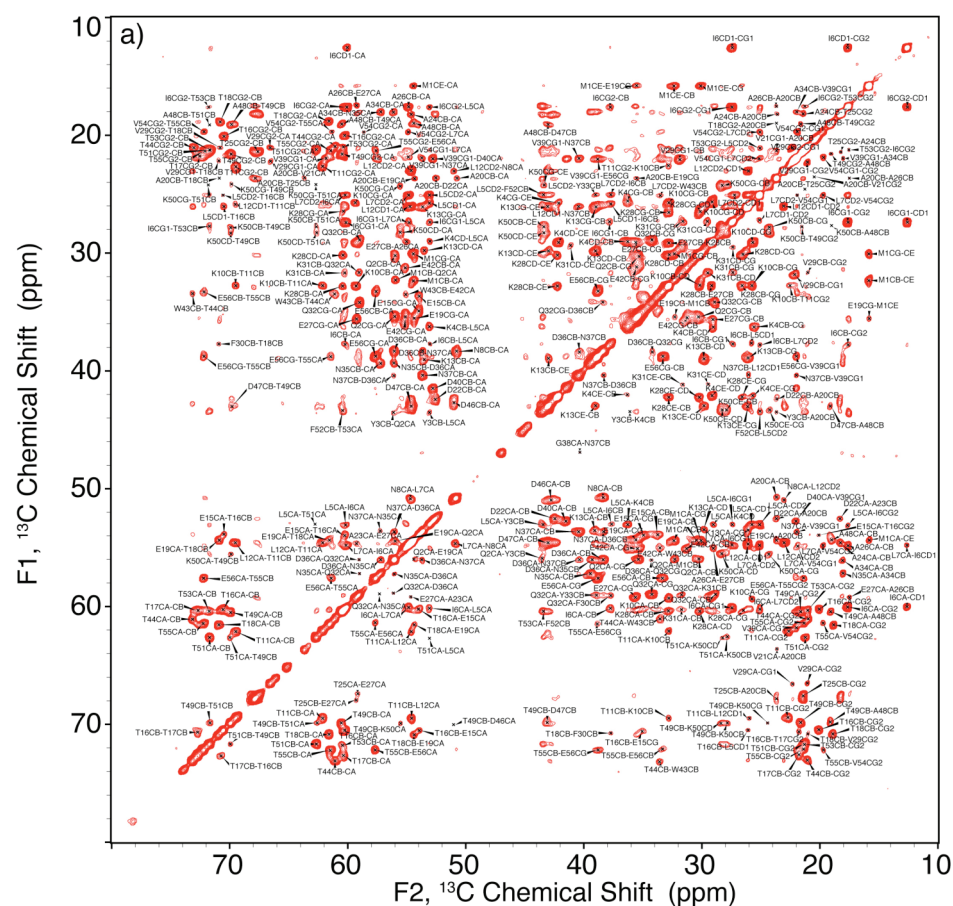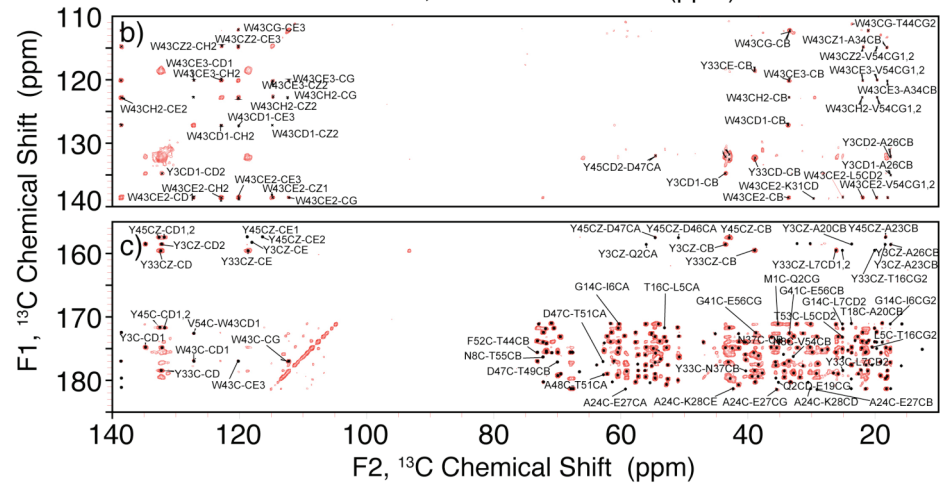

Supplement: pnas_0712393105_3.pdf [file pnas_0712393105_3.pdf]

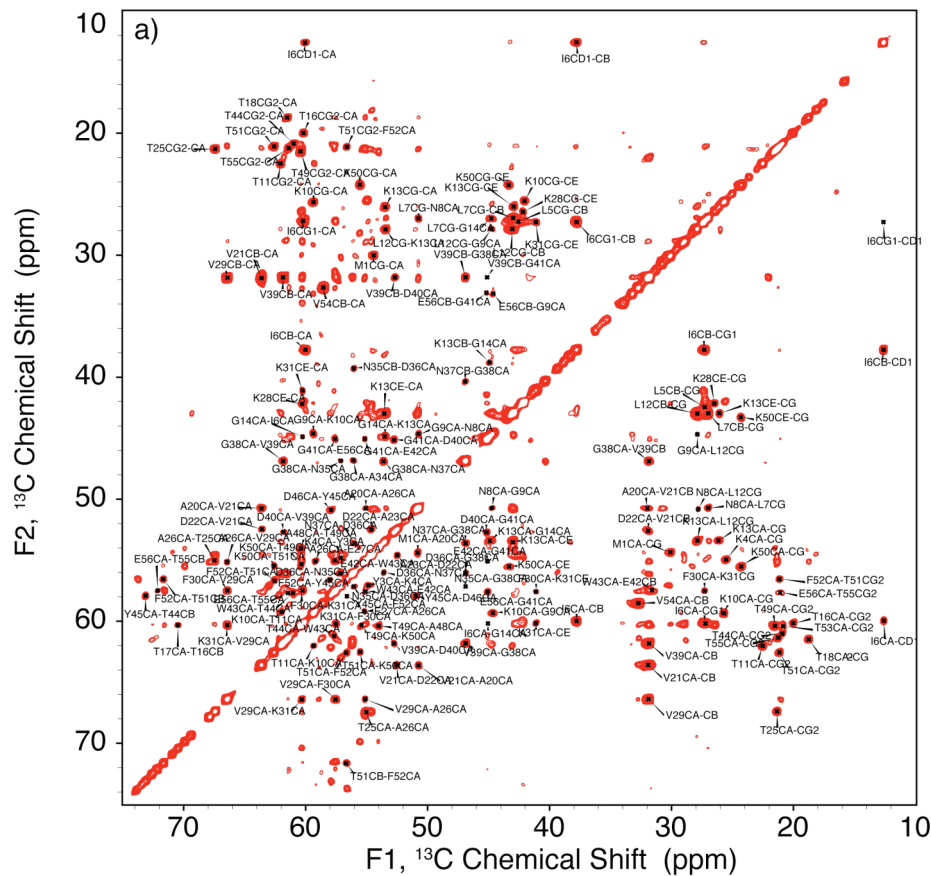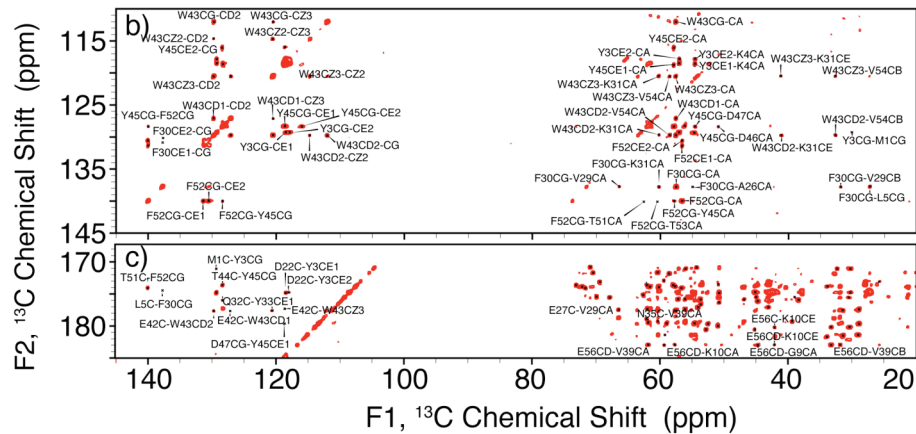

Supplement: pnas_0712393105_4.pdf [file pnas_0712393105_4.pdf]

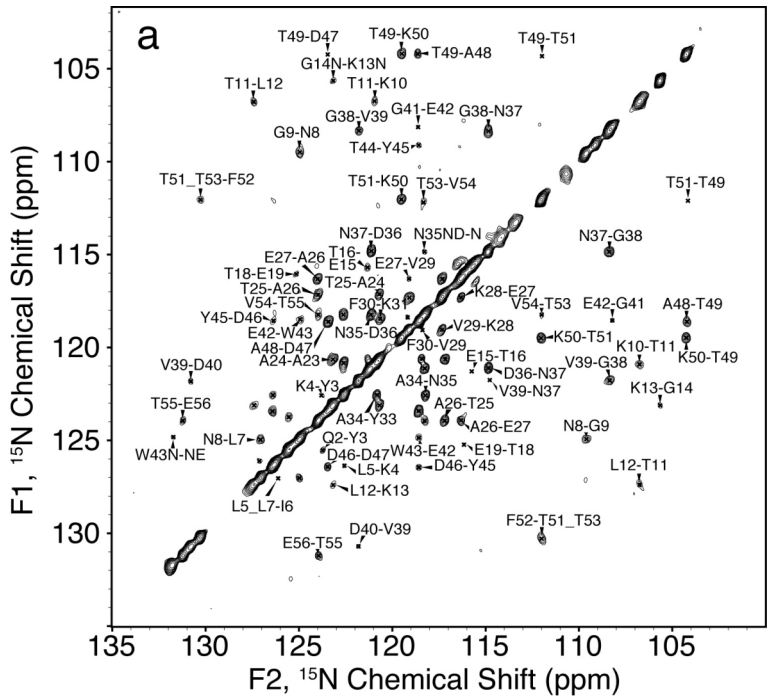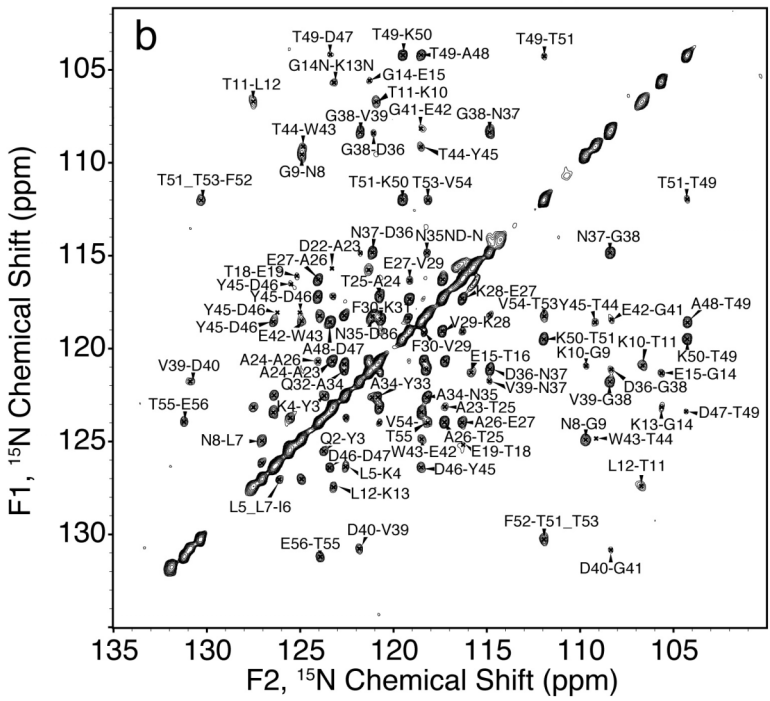

Supplement: pnas_0712393105_5.pdf [file pnas_0712393105_5.pdf]

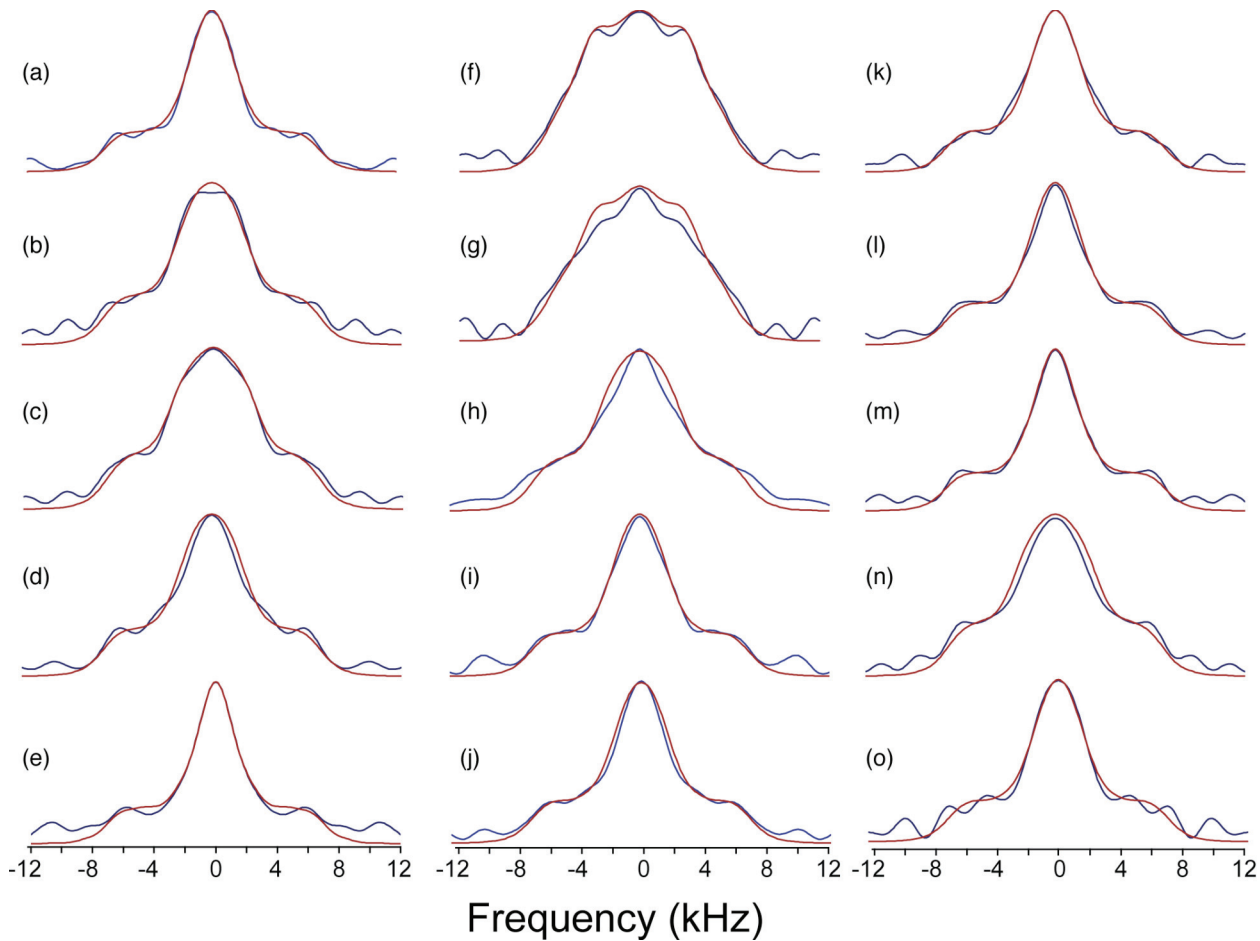

Supplement: pnas_0712393105_6.pdf [file pnas_0712393105_6.pdf]

(a)

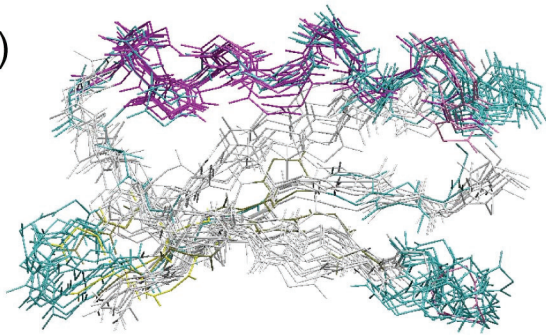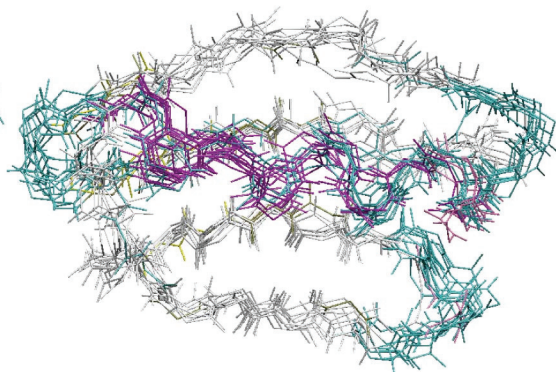

(b)

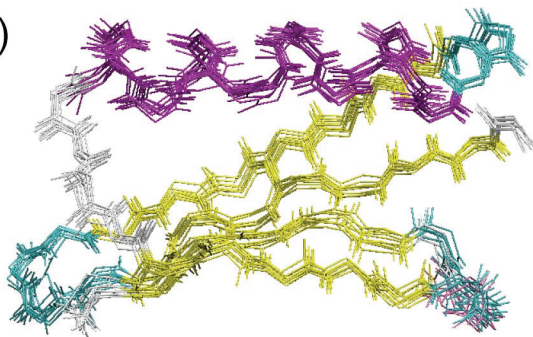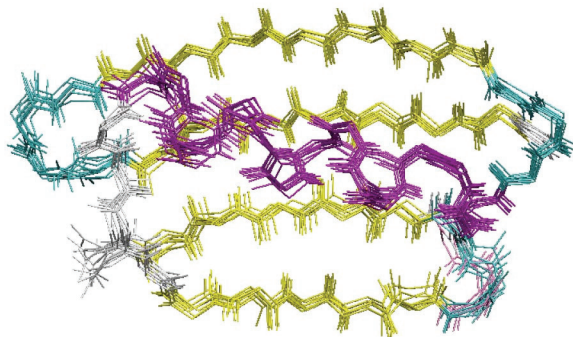

(c)

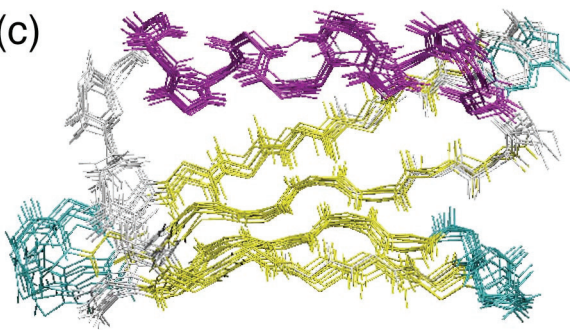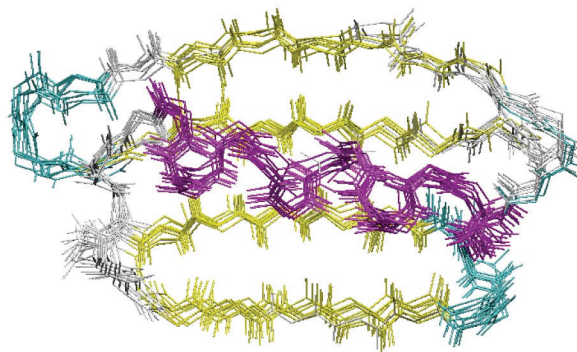

(d)

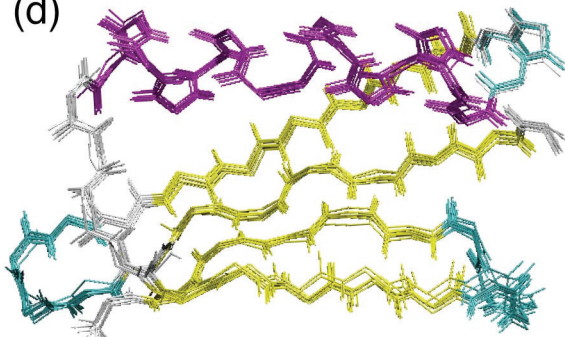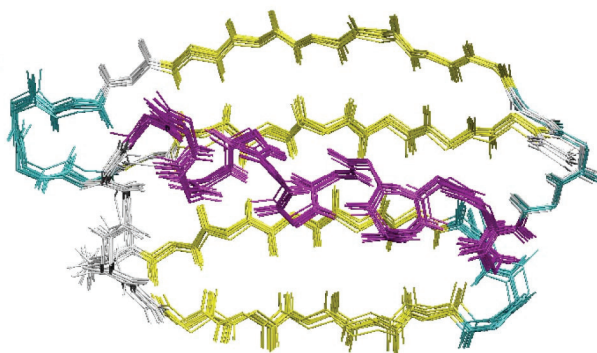

Supplement: pnas_0712393105_7.pdf [file pnas_0712393105_7.pdf]

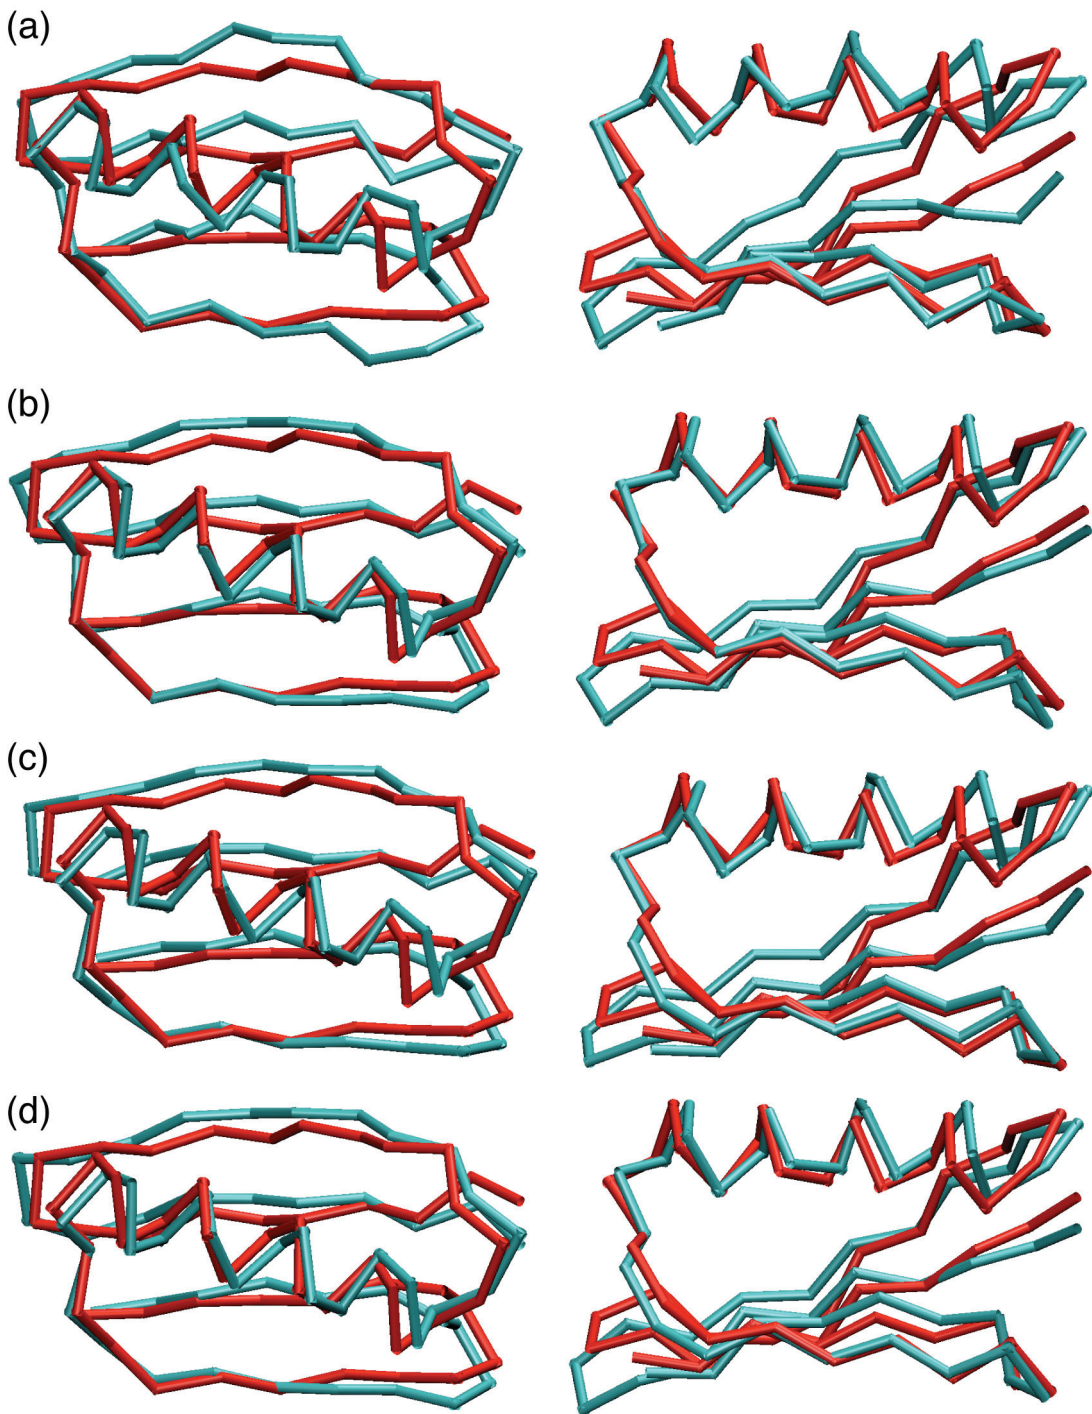

Supplement: pnas_0712393105_8.pdf [file pnas_0712393105_8.pdf]

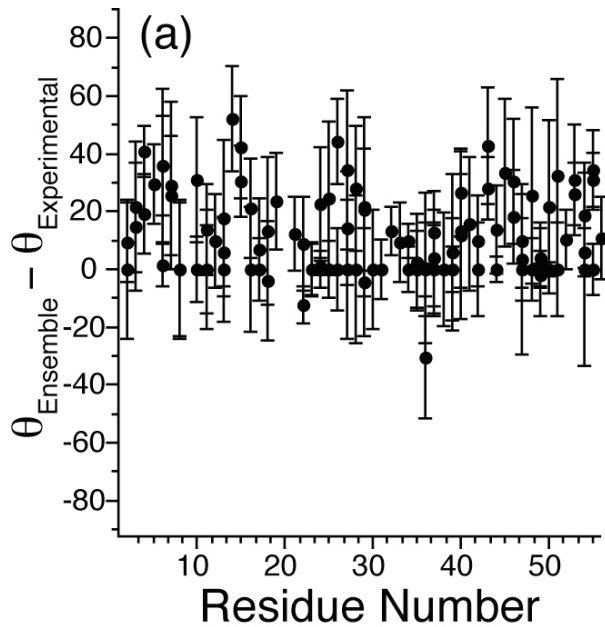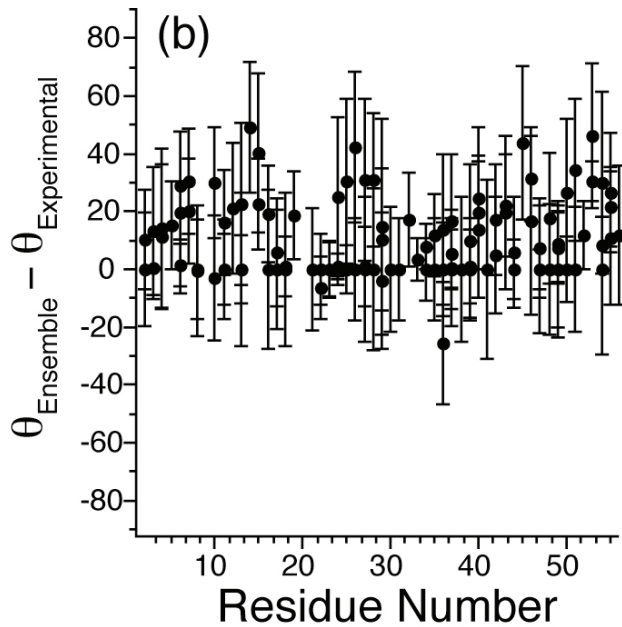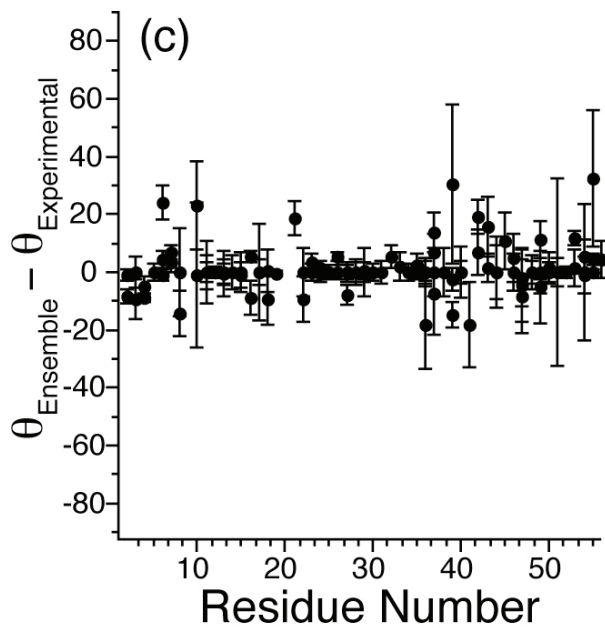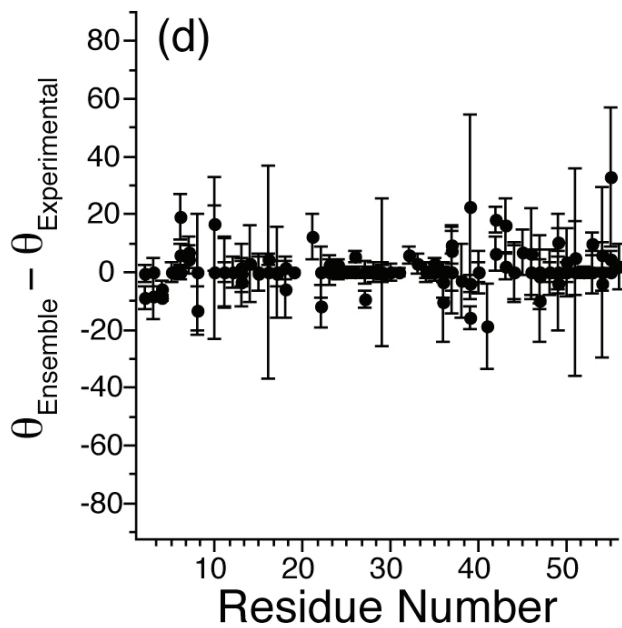

Supplement: pnas_0712393105_9.pdf [file pnas_0712393105_9.pdf]
